# Supplementary material for: Can Machine Learning Be Better than Biased Readers?
Source: MDPI journal article supplement (doi:10.3390/tomography9030074), 2023-04-28
Supplement: s1 [file s1]

**Supplementary Table S1.** Descriptive statistics (mean  $\pm$  sd) of the models trained using different strengths and types of biases. Bias\_fn: false negative bias introduced to the training set as described in Table 1. Bias\_fp: false positive bias introduced to the training set as described in Table 1. Random: random error introduced to the training set as described in Table 1. Baseline: baseline model. Regularized: improved model with regularization applied while training.

| % Level of Introduced Error | Error type | Model       | Accuracy            | AUC                 | Number of true positives | Number of true negatives | Number of false negatives | Number of false positives |
|-----------------------------|------------|-------------|---------------------|---------------------|--------------------------|--------------------------|---------------------------|---------------------------|
| 0                           | /          | Baseline    | 0.8376 $\pm$ 0.0142 | 0.794 $\pm$ 0.0199  | 377.6667 $\pm$ 1.8559    | 145 $\pm$ 10.0167        | 12.3333 $\pm$ 1.8559      | 89 $\pm$ 10.0167          |
|                             |            | Regularized | 0.8584 $\pm$ 0.0152 | 0.8295 $\pm$ 0.0235 | 368.6667 $\pm$ 5.3333    | 167 $\pm$ 13.5769        | 21.3333 $\pm$ 5.3333      | 67 $\pm$ 13.5769          |
| 5                           | Bias_fn    | Baseline    | 0.8128 $\pm$ 0.0126 | 0.7974 $\pm$ 0.0191 | 335 $\pm$ 6.6408         | 172.2 $\pm$ 11.5213      | 55 $\pm$ 6.6408           | 61.8 $\pm$ 11.5213        |
|                             |            | Regularized | 0.8446 $\pm$ 0.0185 | 0.8138 $\pm$ 0.0287 | 365.4 $\pm$ 5.938        | 161.6 $\pm$ 16.5487      | 24.6 $\pm$ 5.938          | 72.4 $\pm$ 16.5487        |
|                             | Bias_fp    | Baseline    | 0.8109 $\pm$ 0.0109 | 0.7605 $\pm$ 0.0161 | 375.2 $\pm$ 5.1711       | 130.8 $\pm$ 9.4414       | 14.8 $\pm$ 5.1711         | 103.2 $\pm$ 9.4414        |
|                             |            | Regularized | 0.8625 $\pm$ 0.007  | 0.8464 $\pm$ 0.0022 | 355.2 $\pm$ 11.8042      | 183 $\pm$ 7.5697         | 34.8 $\pm$ 11.8042        | 51 $\pm$ 7.5697           |
|                             | Random     | Baseline    | 0.8128 $\pm$ 0.0068 | 0.7756 $\pm$ 0.0082 | 360.6 $\pm$ 4.9051       | 146.6 $\pm$ 4.9457       | 29.4 $\pm$ 4.9051         | 87.4 $\pm$ 4.9457         |
|                             |            | Regularized | 0.8683 $\pm$ 0.0059 | 0.8447 $\pm$ 0.0084 | 366.2 $\pm$ 4.4542       | 175.6 $\pm$ 5.5191       | 23.8 $\pm$ 4.4542         | 58.4 $\pm$ 5.5191         |
| 10                          | Bias_fn    | Baseline    | 0.7721 $\pm$ 0.016  | 0.7739 $\pm$ 0.0165 | 299 $\pm$ 6.7231         | 182.8 $\pm$ 5.1711       | 91 $\pm$ 6.7231           | 51.2 $\pm$ 5.1711         |
|                             |            | Regularized | 0.8423 $\pm$ 0.007  | 0.819 $\pm$ 0.0171  | 355.8 $\pm$ 10.5612      | 169.8 $\pm$ 14.0656      | 34.2 $\pm$ 10.5612        | 64.2 $\pm$ 14.0656        |
|                             | Bias_fp    | Baseline    | 0.8138 $\pm$ 0.0161 | 0.7722 $\pm$ 0.0221 | 366 $\pm$ 2.5495         | 141.8 $\pm$ 11.0336      | 24 $\pm$ 2.5495           | 92.2 $\pm$ 11.0336        |
|                             |            | Regularized | 0.8288 $\pm$ 0.0171 | 0.7874 $\pm$ 0.0272 | 371.8 $\pm$ 5.8344       | 145.4 $\pm$ 16.0019      | 18.2 $\pm$ 5.8344         | 88.6 $\pm$ 16.0019        |
|                             | Random     | Baseline    | 0.7837 $\pm$ 0.0087 | 0.7534 $\pm$ 0.0096 | 341 $\pm$ 5.099          | 148 $\pm$ 4.7223         | 49 $\pm$ 5.099            | 86 $\pm$ 4.7223           |
|                             |            | Regularized | 0.8135 $\pm$ 0.0247 | 0.768 $\pm$ 0.0378  | 370.4 $\pm$ 7.3389       | 137.2 $\pm$ 21.3832      | 19.6 $\pm$ 7.3389         | 96.8 $\pm$ 21.3832        |

|    |               |             |                     |                     |                     |                     |                     |                     |
|----|---------------|-------------|---------------------|---------------------|---------------------|---------------------|---------------------|---------------------|
| 15 | Bias_fn       | Baseline    | $0.7282 \pm 0.0184$ | $0.7467 \pm 0.0168$ | $262.4 \pm 11.0481$ | $192 \pm 5.3759$    | $127.6 \pm 11.0481$ | $42 \pm 5.3759$     |
|    |               | Regularized | $0.8494 \pm 0.011$  | $0.8397 \pm 0.0206$ | $342.6 \pm 7.1666$  | $187.4 \pm 13.8838$ | $47.4 \pm 7.1666$   | $46.6 \pm 13.8838$  |
|    | Bias_fp       | Baseline    | $0.7599 \pm 0.0069$ | $0.6946 \pm 0.0095$ | $372.8 \pm 2.1541$  | $101.4 \pm 4.8642$  | $17.2 \pm 2.1541$   | $132.6 \pm 4.8642$  |
|    |               | Regularized | $0.8417 \pm 0.0077$ | $0.805 \pm 0.0152$  | $371.2 \pm 6.8659$  | $154 \pm 10.9453$   | $18.8 \pm 6.8659$   | $80 \pm 10.9453$    |
|    | Random        | Baseline    | $0.7529 \pm 0.0056$ | $0.7271 \pm 0.0028$ | $323.8 \pm 8.0833$  | $146 \pm 5$         | $66.2 \pm 8.0833$   | $88 \pm 5$          |
|    |               | Regularized | $0.8484 \pm 0.0108$ | $0.8235 \pm 0.0167$ | $360 \pm 6.9065$    | $169.4 \pm 10.6986$ | $30 \pm 6.9065$     | $64.6 \pm 10.6986$  |
| 20 | Bias_fn       | Baseline    | $0.6548 \pm 0.0117$ | $0.6934 \pm 0.0079$ | $210.2 \pm 10.9973$ | $198.4 \pm 5.1827$  | $179.8 \pm 10.9973$ | $35.6 \pm 5.1827$   |
|    |               | Regularized | $0.8474 \pm 0.0039$ | $0.8333 \pm 0.01$   | $347 \pm 6.5955$    | $181.8 \pm 8.4817$  | $43 \pm 6.5955$     | $52.2 \pm 8.4817$   |
|    | Bias_fp       | Baseline    | $0.7522 \pm 0.012$  | $0.6859 \pm 0.0158$ | $371 \pm 3.1623$    | $98.4 \pm 7.6328$   | $19 \pm 3.1623$     | $135.6 \pm 7.6328$  |
|    |               | Regularized | $0.8054 \pm 0.0269$ | $0.756 \pm 0.041$   | $372 \pm 7.1554$    | $130.6 \pm 22.936$  | $18 \pm 7.1554$     | $103.4 \pm 22.936$  |
|    | Random Random | Baseline    | $0.7032 \pm 0.0051$ | $0.6771 \pm 0.0081$ | $304.8 \pm 7.9524$  | $134 \pm 7.6616$    | $85.2 \pm 7.9524$   | $100 \pm 7.6616$    |
|    |               | Regularized | $0.8381 \pm 0.0201$ | $0.8122 \pm 0.0325$ | $357.2 \pm 8.2668$  | $165.8 \pm 19.5765$ | $32.8 \pm 8.2668$   | $68.2 \pm 19.5765$  |
| 25 | Bias_fn       | Baseline    | $0.6144 \pm 0.0158$ | $0.6599 \pm 0.0109$ | $186.4 \pm 13.178$  | $197 \pm 4.7749$    | $203.6 \pm 13.178$  | $37 \pm 4.7749$     |
|    |               | Regularized | $0.7333 \pm 0.0376$ | $0.7725 \pm 0.0255$ | $240.2 \pm 29.5456$ | $217.4 \pm 7.1944$  | $149.8 \pm 29.5456$ | $16.6 \pm 7.1944$   |
|    | Bias_fp       | Baseline    | $0.749 \pm 0.0098$  | $0.6768 \pm 0.0133$ | $376.6 \pm 2.7857$  | $90.8 \pm 6.6888$   | $13.4 \pm 2.7857$   | $143.2 \pm 6.6888$  |
|    |               | Regularized | $0.8054 \pm 0.0259$ | $0.7522 \pm 0.0379$ | $376.4 \pm 6.063$   | $126.2 \pm 20.4436$ | $13.6 \pm 6.063$    | $107.8 \pm 20.4436$ |
|    | Random        | Baseline    | $0.6724 \pm 0.0123$ | $0.6528 \pm 0.0157$ | $285.2 \pm 4.2237$  | $134.4 \pm 7.5206$  | $104.8 \pm 4.2237$  | $99.6 \pm 7.5206$   |
|    |               | Regularized | $0.8304 \pm 0.0106$ | $0.8158 \pm 0.008$  | $341 \pm 16.9145$   | $177.2 \pm 11.8634$ | $49 \pm 16.9145$    | $56.8 \pm 11.8634$  |
